## **Exercise hypertension and cardiopulmonary exercise performance in essential hypertensive patients taking diverse antihypertensive medications**

Pan Wen<sup>1</sup> Ji Tengfei<sup>1</sup> Jing Zhicong<sup>2</sup> Hu Bingtao<sup>3</sup> Liu Dan<sup>1</sup> Wei Jin<sup>1#</sup>

1 Department of Cardiology, XJTU Affiliated Second Hospital, Xi'an, Shaanxi, 710082, China;

2 Department of Cardiology, XJTU Affiliated First Hospital, Xi'an, Shaanxi, 710051, China;

3 Department of Rehabilitation Medicine, XJTU Affiliated Second Hospital, Xi'an, Shaanxi, 710082, China.

Wen Pan and Ji Tengfei contributed equally to this work.

# Corresponding author: Wei Jin, The Second Affiliated Hospital of Xi'an Jiaotong University, Xi'an

The authors have withdrawn their manuscript owing to [The key reasons for requesting the withdrawal of the preprint are as follows. Firstly, there is a serious error in the statistical analysis. Specifically, the data that should have been analyzed as having a normal distribution was mistakenly treated as having a non-normal distribution. This methodological flaw significantly undermines the validity and reliability of the study results. Secondly, in the logistic regression, there was an incorrect assignment of multicategorical independent variables included in the model. Due to these critical mistakes, we firmly believe that withdrawing the preprint is essential to prevent any potential

rectifying these errors and conducting a meticulous review before resubmitting]. Therefore, the authors do not wish this work to be cited as reference for the project. If you have any questions, please contact the corresponding author.
